# Supplementary material for: Insecticide Effect of Zeolites on the Tomato Leafminer Tuta absoluta (Lepidoptera: Gelechiidae)
Source: PubMed Central journal article supplement (PMC5198220; doi:10.3390/insects7040072), 2016-12-02
Supplement: insects-07-00072-s001.pdf [file insects-07-00072-s001.pdf]

# Supplementary Materials: Insecticide Effect of Zeolites on the Tomato Leafminer *Tuta absoluta* (Lepidoptera: Gelechiidae)

Caroline De Smedt \*, Veerle Van Damme, Patrick De Clercq and Pieter Spanoghe

**Table S1.** Percentage corrected mortality ( $\pm$ SE) of *Tuta absoluta* eggs in topical and residual bioassays, using the insecticide materials presented in Table 1 ( $n = 8$ ).

| Treatment                | Egg Mortality (%)      |                         |                           |                        |                         |                           |
|--------------------------|------------------------|-------------------------|---------------------------|------------------------|-------------------------|---------------------------|
|                          | Mortality              |                         |                           | Corrected Mortality    |                         |                           |
|                          | 400 mg·L <sup>-1</sup> | 4000 mg·L <sup>-1</sup> | 20,000 mg·L <sup>-1</sup> | 400 mg·L <sup>-1</sup> | 4000 mg·L <sup>-1</sup> | 20,000 mg·L <sup>-1</sup> |
| <b>Topical Bioassay</b>  |                        |                         |                           |                        |                         |                           |
| Control                  | 7.1 $\pm$ 2.66         | 7.1 $\pm$ 2.66          | 7.1 $\pm$ 2.66            |                        |                         |                           |
| Z-1                      | 7.5 $\pm$ 3.65         | 10.0 $\pm$ 3.78         | 10.0 $\pm$ 3.78           | 0.4 $\pm$ 4.87         | 3.1 $\pm$ 4.98          | 3.1 $\pm$ 4.98            |
| Z-2                      | 15.0 $\pm$ 3.27        | 20.0 $\pm$ 5.35         | 30.0 $\pm$ 5.35           | 8.5 $\pm$ 4.55         | 13.9 $\pm$ 6.44         | 24.6 $\pm$ 6.47           |
| Z-3                      | 15.0 $\pm$ 3.27        | 12.5 $\pm$ 5.26         | 25.0 $\pm$ 3.27           | 8.5 $\pm$ 4.55         | 5.8 $\pm$ 6.35          | 19.2 $\pm$ 4.57           |
| Z-4                      | 17.5 $\pm$ 2.50        | 22.0 $\pm$ 5.54         | 20.0 $\pm$ 4.71           | 11.2 $\pm$ 3.94        | 16.0 $\pm$ 6.63         | 13.9 $\pm$ 5.84           |
| Z-5                      | 31.1 $\pm$ 3.51        | 26.0 $\pm$ 4.27         | 30.0 $\pm$ 6.15           | 25.8 $\pm$ 4.80        | 20.3 $\pm$ 5.45         | 24.6 $\pm$ 7.25           |
| Z-6                      | 25.0 $\pm$ 5.00        | 18.0 $\pm$ 4.67         | 22.5 $\pm$ 4.53           | 19.2 $\pm$ 6.12        | 11.7 $\pm$ 5.79         | 16.5 $\pm$ 5.68           |
| Z-7                      | 10.0 $\pm$ 3.78        | 7.5 $\pm$ 5.26          | 7.5 $\pm$ 3.66            | 3.1 $\pm$ 4.98         | 0.4 $\pm$ 6.35          | 0.4 $\pm$ 4.87            |
| Z-8                      | 15.0 $\pm$ 5.00        | 16.7 $\pm$ 4.14         | 27.5 $\pm$ 5.26           | 8.5 $\pm$ 6.10         | 10.3 $\pm$ 5.31         | 21.9 $\pm$ 6.38           |
| Z-9                      | 17.5 $\pm$ 5.90        | 17.5 $\pm$ 4.53         | 22.5 $\pm$ 5.90           | 11.2 $\pm$ 6.98        | 11.2 $\pm$ 5.67         | 16.6 $\pm$ 6.99           |
| C-1                      | 95.0 $\pm$ 3.27        | 92.5 $\pm$ 3.66         | 95.0 $\pm$ 3.27           | 94.6 $\pm$ 5.29        | 91.9 $\pm$ 5.54         | 94.6 $\pm$ 5.29           |
| B-1                      | 4.3 $\pm$ 2.28         | 4.7 $\pm$ 2.12          | 11.4 $\pm$ 4.04           | 0.0 $\pm$ 0.00         | 0.0 $\pm$ 0.00          | 4.6 $\pm$ 5.21            |
| B-2                      | 2.9 $\pm$ 2.86         | 8.6 $\pm$ 4.04          | 12.5 $\pm$ 5.26           | 0.0 $\pm$ 0.00         | 1.5 $\pm$ 5.21          | 5.8 $\pm$ 6.35            |
| <b>Residual Bioassay</b> |                        |                         |                           |                        |                         |                           |
| Control                  | 4.3 $\pm$ 2.28         | 4.3 $\pm$ 2.28          | 4.3 $\pm$ 2.28            |                        |                         |                           |
| Z-1                      | 32.5 $\pm$ 3.66        | 32.5 $\pm$ 6.48         | 35.0 $\pm$ 7.32           | 29.5 $\pm$ 4.56        | 29.5 $\pm$ 7.21         | 32.1 $\pm$ 8.04           |
| Z-2                      | 17.5 $\pm$ 5.90        | 27.5 $\pm$ 5.26         | 25.0 $\pm$ 5.00           | 13.8 $\pm$ 6.62        | 24.3 $\pm$ 6.02         | 21.6 $\pm$ 5.76           |
| Z-3                      | 22.5 $\pm$ 7.01        | 32.5 $\pm$ 5.26         | 30.0 $\pm$ 6.55           | 19.0 $\pm$ 7.71        | 29.5 $\pm$ 6.03         | 26.9 $\pm$ 7.27           |
| Z-4                      | 15.0 $\pm$ 5.00        | 30.0 $\pm$ 6.55         | 32.5 $\pm$ 6.48           | 11.2 $\pm$ 5.75        | 26.9 $\pm$ 7.27         | 29.5 $\pm$ 7.21           |
| Z-5                      | 12.5 $\pm$ 3.66        | 35.0 $\pm$ 5.00         | 40.0 $\pm$ 5.35           | 8.6 $\pm$ 4.51         | 32.1 $\pm$ 5.79         | 37.3 $\pm$ 6.13           |
| Z-6                      | 22.5 $\pm$ 5.90        | 42.5 $\pm$ 4.53         | 47.5 $\pm$ 6.48           | 19.0 $\pm$ 6.62        | 39.9 $\pm$ 5.38         | 45.2 $\pm$ 7.25           |
| Z-7                      | 20.0 $\pm$ 5.35        | 22.5 $\pm$ 5.90         | 25.0 $\pm$ 5.00           | 16.4 $\pm$ 6.08        | 19.0 $\pm$ 6.62         | 21.6 $\pm$ 5.76           |
| Z-8                      | 17.5 $\pm$ 4.53        | 30.0 $\pm$ 3.78         | 27.5 $\pm$ 3.66           | 13.8 $\pm$ 5.31        | 26.9 $\pm$ 4.65         | 24.3 $\pm$ 4.54           |
| Z-9                      | 20.0 $\pm$ 5.35        | 37.5 $\pm$ 7.96         | 30.0 $\pm$ 5.35           | 16.4 $\pm$ 6.08        | 34.7 $\pm$ 8.69         | 26.9 $\pm$ 6.10           |
| C-1                      | 25.0 $\pm$ 6.27        | 25.0 $\pm$ 5.00         | 32.5 $\pm$ 3.66           | 21.6 $\pm$ 6.99        | 21.6 $\pm$ 5.76         | 29.5 $\pm$ 4.56           |
| B-1                      | 4.0 $\pm$ 1.84         | 8.0 $\pm$ 3.04          | 10.0 $\pm$ 2.41           | 0.0 $\pm$ 0.00         | 3.9 $\pm$ 3.97          | 6.0 $\pm$ 3.46            |
| B-2                      | 9.1 $\pm$ 4.15         | 10.9 $\pm$ 3.15         | 18.2 $\pm$ 4.23           | 5.0 $\pm$ 4.94         | 6.9 $\pm$ 4.06          | 14.5 $\pm$ 5.03           |

**Table S2.** Percentage corrected mortality ( $\pm$ SE) of *Tuta absoluta* eggs and larvae in topical and residual bioassays, using the insecticide materials presented in Table 1 ( $n = 8$ ).

| Treatment                | Egg + Larvae Mortality (%) |                         |                           |                        |                         |                           |
|--------------------------|----------------------------|-------------------------|---------------------------|------------------------|-------------------------|---------------------------|
|                          | Mortality                  |                         |                           | Corrected Mortality    |                         |                           |
|                          | 400 mg·L <sup>-1</sup>     | 4000 mg·L <sup>-1</sup> | 20,000 mg·L <sup>-1</sup> | 400 mg·L <sup>-1</sup> | 4000 mg·L <sup>-1</sup> | 20,000 mg·L <sup>-1</sup> |
| <b>Topical Bioassay</b>  |                            |                         |                           |                        |                         |                           |
| <b>Control</b>           | 8.6 $\pm$ 3.45             | 8.6 $\pm$ 3.45          | 8.6 $\pm$ 3.45            |                        |                         |                           |
| <b>Z-1</b>               | 32.5 $\pm$ 6.48            | 32.5 $\pm$ 5.26         | 40.0 $\pm$ 5.35           | 26.2 $\pm$ 8.09        | 26.2 $\pm$ 6.95         | 34.4 $\pm$ 7.08           |
| <b>Z-2</b>               | 32.5 $\pm$ 3.66            | 37.5 $\pm$ 4.53         | 47.5 $\pm$ 3.66           | 26.2 $\pm$ 5.59        | 31.6 $\pm$ 6.35         | 42.6 $\pm$ 5.73           |
| <b>Z-3</b>               | 35.0 $\pm$ 3.27            | 35.0 $\pm$ 3.27         | 42.5 $\pm$ 4.53           | 28.9 $\pm$ 5.32        | 28.9 $\pm$ 5.32         | 37.1 $\pm$ 6.39           |
| <b>Z-4</b>               | 32.5 $\pm$ 6.48            | 46.0 $\pm$ 4.27         | 40.0 $\pm$ 5.77           | 26.2 $\pm$ 8.09        | 40.9 $\pm$ 6.20         | 34.4 $\pm$ 7.47           |
| <b>Z-5</b>               | 40.0 $\pm$ 3.33            | 40.0 $\pm$ 2.98         | 42.0 $\pm$ 4.67           | 34.4 $\pm$ 5.41        | 34.4 $\pm$ 5.16         | 36.6 $\pm$ 6.50           |
| <b>Z-6</b>               | 45.0 $\pm$ 3.27            | 36.0 $\pm$ 4.00         | 42.5 $\pm$ 4.53           | 39.8 $\pm$ 5.42        | 30.0 $\pm$ 5.89         | 37.1 $\pm$ 6.39           |
| <b>Z-7</b>               | 22.5 $\pm$ 7.01            | 20.0 $\pm$ 7.56         | 22.5 $\pm$ 5.90           | 15.2 $\pm$ 8.56        | 12.5 $\pm$ 9.10         | 15.2 $\pm$ 7.50           |
| <b>Z-8</b>               | 30.0 $\pm$ 6.55            | 40.0 $\pm$ 3.48         | 52.5 $\pm$ 5.26           | 23.4 $\pm$ 8.14        | 34.4 $\pm$ 5.52         | 48.1 $\pm$ 7.12           |
| <b>Z-9</b>               | 40.0 $\pm$ 6.55            | 52.5 $\pm$ 3.66         | 52.5 $\pm$ 5.26           | 34.4 $\pm$ 8.20        | 48.1 $\pm$ 5.80         | 48.1 $\pm$ 7.12           |
| <b>C-1</b>               | 100.0 $\pm$ 0.00           | 100.0 $\pm$ 0.00        | 100.0 $\pm$ 0.00          | 100.0 $\pm$ 5.34       | 100.0 $\pm$ 5.34        | 100.0 $\pm$ 5.34          |
| <b>B-1</b>               | 10.0 $\pm$ 3.48            | 10.6 $\pm$ 2.50         | 18.6 $\pm$ 3.90           | 1.6 $\pm$ 5.36         | 2.2 $\pm$ 4.66          | 10.9 $\pm$ 5.71           |
| <b>B-2</b>               | 2.9 $\pm$ 2.86             | 17.1 $\pm$ 2.86         | 20.0 $\pm$ 5.35           | 0.0 $\pm$ 0.00         | 9.4 $\pm$ 4.92          | 12.5 $\pm$ 6.98           |
| <b>Residual Bioassay</b> |                            |                         |                           |                        |                         |                           |
| <b>Control</b>           | 8.6 $\pm$ 4.04             | 8.6 $\pm$ 4.04          | 8.6 $\pm$ 4.04            |                        |                         |                           |
| <b>Z-1</b>               | 62.5 $\pm$ 4.27            | 57.5 $\pm$ 5.56         | 60.0 $\pm$ 9.43           | 59.0 $\pm$ 6.94        | 53.5 $\pm$ 7.88         | 56.3 $\pm$ 11.49          |
| <b>Z-2</b>               | 45.0 $\pm$ 6.90            | 57.5 $\pm$ 5.56         | 50.0 $\pm$ 5.04           | 39.8 $\pm$ 8.92        | 53.5 $\pm$ 7.88         | 45.3 $\pm$ 7.34           |
| <b>Z-3</b>               | 55.0 $\pm$ 5.91            | 67.5 $\pm$ 6.11         | 67.5 $\pm$ 7.07           | 50.8 $\pm$ 8.15        | 64.5 $\pm$ 8.50         | 64.5 $\pm$ 9.35           |
| <b>Z-4</b>               | 52.5 $\pm$ 10.65           | 60.0 $\pm$ 8.73         | 57.5 $\pm$ 9.72           | 48.1 $\pm$ 12.64       | 56.3 $\pm$ 10.81        | 53.5 $\pm$ 11.75          |
| <b>Z-5</b>               | 40.0 $\pm$ 6.17            | 65.0 $\pm$ 3.09         | 67.5 $\pm$ 4.96           | 34.4 $\pm$ 8.21        | 61.7 $\pm$ 6.19         | 64.5 $\pm$ 7.55           |
| <b>Z-6</b>               | 42.5 $\pm$ 6.61            | 80.0 $\pm$ 6.17         | 80.0 $\pm$ 3.56           | 37.1 $\pm$ 8.63        | 78.1 $\pm$ 8.78         | 78.1 $\pm$ 6.83           |
| <b>Z-7</b>               | 40.0 $\pm$ 8.73            | 60.0 $\pm$ 6.17         | 57.5 $\pm$ 7.51           | 34.4 $\pm$ 10.63       | 56.3 $\pm$ 8.44         | 53.5 $\pm$ 9.62           |
| <b>Z-8</b>               | 47.5 $\pm$ 9.39            | 62.5 $\pm$ 7.51         | 52.5 $\pm$ 4.96           | 42.6 $\pm$ 11.33       | 59.0 $\pm$ 9.68         | 48.1 $\pm$ 7.31           |
| <b>Z-9</b>               | 57.5 $\pm$ 8.31            | 72.5 $\pm$ 11.23        | 67.5 $\pm$ 3.45           | 53.5 $\pm$ 10.38       | 69.9 $\pm$ 13.42        | 64.5 $\pm$ 6.47           |
| <b>C-1</b>               | 97.5 $\pm$ 2.36            | 100.0 $\pm$ 0.00        | 100.0 $\pm$ 0.00          | 97.3 $\pm$ 6.68        | 100.0 $\pm$ 6.25        | 100.0 $\pm$ 6.25          |
| <b>B-1</b>               | 14.0 $\pm$ 3.87            | 17.0 $\pm$ 3.33         | 19.2 $\pm$ 3.90           | 5.9 $\pm$ 6.12         | 9.2 $\pm$ 5.74          | 11.6 $\pm$ 6.16           |
| <b>B-2</b>               | 10.9 $\pm$ 4.15            | 14.6 $\pm$ 2.82         | 20.0 $\pm$ 4.02           | 2.6 $\pm$ 6.33         | 6.5 $\pm$ 5.39          | 12.5 $\pm$ 6.26           |

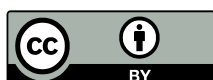

© 2016 by the authors. Submitted for possible open access publication under the terms and conditions of the Creative Commons Attribution (CC-BY) license (<http://creativecommons.org/licenses/by/4.0/>).
